# Supplementary material
Source: Springer Nature journal article supplement (https://www.springermedizin.de/resource/supplementary/12889_2013_5895_MOESM1_ESM.pdf/9496308)
Supplement: MOESM1 [file 9496308]

**ID code** |\_\_|\_\_|\_\_|\_\_|\_\_|\_\_|\_\_|

(Formed by:

- recruitment site: letter A (RMA), H (RMH), C (Caritas)
- enrollment number(4 digits), independent for each recruitment site
- access number (2 digits) (confirmed by identity check)

**Year of birth** |\_\_|\_\_|\_\_|\_\_|

**Sex** |\_1\_| M |\_2\_| F

**Contry of birth** \_\_\_\_\_

**Nationality** \_\_\_\_\_

**Education** (years of schooling, not applicable if younger than 6 years of age) |\_\_|\_\_|

**Date first arrival in Italy** (mm/yyyy) |\_\_|\_\_|/|\_\_|\_\_|\_\_|\_\_|

**Residence permit** (main reason for issuing)

|\_1\_| Regular employment |\_2\_| Family reasons |\_3\_| Study |\_4\_| Humanitarian grounds  
|\_5\_| International protection |\_6\_| Refugee |\_7\_| Medical reasons |\_8\_| Religious  
worker |\_9\_| Tourist visa (valid) |\_10\_| Other |\_11\_| Awaiting renewal |\_12\_| Expired  
|\_13\_| never had a residence permit

**Main present occupation** (not applicable if younger than 15 years of age)

|\_1\_| Street seller |\_2\_| Self-employed (sales person, craftsman) |\_3\_| Employee |\_4\_|  
Caretaker, Baby-sitter |\_5\_| Housekeeper |\_6\_| Health care worker |\_7\_| Student |\_8\_|  
Restaurant staff |\_9\_| Farmer |\_10\_| Construction worker |\_11\_| Industry worker |\_12\_|  
Housewife |\_13\_| Other |\_14\_| Unemployed

**Knowledge of italian language**

(evaluated by the interviewer)

none/little/fair

**Presently lives** (there can be more than one answer)

|\_1\_| Privately owned apartment |\_2\_| Rented apartment |\_3\_| Apartment owned by  
company/boss |\_4\_| Place of work |\_5\_| Daycare center, homeless shelter |\_6\_|  
Abandoned building (squatter) |\_7\_| hut/caravan/tent |\_8\_| Homeless |\_9\_| Other

## **B) CLINICAL PATHWAYS**

**Registration with the Italian National Health Service** YES |\_1\_| NO |\_2\_|

If NOT, why?

\_1\_ In progress    \_2\_ Financial or bureaucratic difficulties    \_3\_ Not having the right to register  
\_4\_ Cultural and language difficulties  
\_5\_ Lack of information    \_6\_ Other

**STP Code** |\_\_|\_\_|\_\_|\_\_|\_\_|\_\_|\_\_|\_\_|\_\_|\_\_|\_\_|\_\_|\_\_|\_\_|\_\_|\_\_|

**Previous contact with health services after arrival in Italy?**    **YES** |\_\_|\_1\_|  
**NO** |\_\_|\_2\_|

**If YES, indicate the date of the first contact (mm/ yyyy)** |\_\_|\_\_|/|\_\_|\_\_|\_\_|\_\_|

### C) HEALTH INFORMATION

**Medical record number** |\_\_|\_\_|\_\_|\_\_|\_\_|\_\_|\_\_|\_\_|\_\_|\_\_|\_\_|\_\_|\_\_|\_\_|\_\_|\_\_|

**Interview/physical examination date**                      (dd/mm/yyyy)

|\_\_|\_\_|/|\_\_|\_\_|/|\_\_|\_\_|\_\_|\_\_|

**Diagnosis or clinical suspicion**

*(description of the diagnosis or if lacking, of the main reason for seeking care)*

---

---

### TB SYMPTOMS SCREENING

**Have you ever been vaccinated with BCG (TB vaccine)?**

\_1\_ **YES**                      \_2\_ **NO**                      \_3\_ Does not remember

**If YES indicate the date of vaccination: (dd/mm/yyyy)** |\_\_|\_\_|/|\_\_|\_\_|/|\_\_|\_\_|\_\_|\_\_|

**Have you ever had tuberculosis (TB)?**

\_1\_ **YES**                      \_2\_ **NO**                      \_3\_ Does not remember

**If YES indicate the date of diagnosis: (dd/mm/yyyy)** |\_\_|\_\_|/|\_\_|\_\_|/|\_\_|\_\_|\_\_|\_\_|

**If YES it was** |\_\_| pulmonary TB                      |\_\_| extrapulmonary TB

**Have you ever had contact with someone with active tuberculosis?**

\_1\_ **YES**                      \_2\_ **NO**                      \_3\_ Does not remember

**If YES indicate the date of the last contact:**

(dd/mm/yyyy) |\_\_|\_\_|/|\_\_|\_\_|/|\_\_|\_\_|\_\_|\_\_|

**If YES it was a** |\_\_| household contact                      |\_\_| close contact

**Have you been coughing for more than 2 weeks?**

\_1\_ **YES**    **If YES since when?: (dd/mm/yyyy)** |\_\_|\_\_|/|\_\_|\_\_|/|\_\_|\_\_|\_\_|\_\_|

\_2\_ **NO**

**Have you had a fever for more than 7 days?** (reported every day for the past 7 days)

YES    **If YES since when?:** (dd/mm/yyyy) |\_\_|\_\_|/|\_\_|\_\_|/|\_\_|\_\_|\_\_|\_\_|

NO

**Have you recently experienced night sweats?**

YES    **If YES since when?:** (dd/mm/yyyy) |\_\_|\_\_|/|\_\_|\_\_|/|\_\_|\_\_|\_\_|\_\_|

NO

**Have you been losing weight (> 10%) recently?**

YES    **If YES since when?:** (dd/mm/yyyy) |\_\_|\_\_|/|\_\_|\_\_|/|\_\_|\_\_|\_\_|\_\_|

NO

**Have you recently been coughing up blood?**

YES    **If YES since when?:** (dd/mm/yyyy) |\_\_|\_\_|/|\_\_|\_\_|/|\_\_|\_\_|\_\_|\_\_|

NO

**If reporting at least one of the previously listed symptoms/signs, individuals should be referred to the tuberculosis clinic at the National Institute for Infectious Diseases L. Spallanzani (INMI) in Rome, for diagnostic workup.**

**In case of a clinical suspicion of TB or if immunodepressed subjects, referral to the tuberculosis clinic at INMI is recommended.**

---

**PATIENT REFERRED TO DIAGNOSTIC WORKUP AT INMI:**

YES                     NO
